# Supplementary material for: Gender Bias in the Evaluation of Teaching Materials
Source: PubMed Central journal article supplement (PMC7326140; doi:10.3389/fpsyg.2020.01074), 2020-05-26
Supplement: Data_Sheet_1.pdf [file Data_Sheet_1.pdf]

## *Supplementary Material*

### **1 Part A**

#### **1.1 Study 1**

The full questionnaire (in English and German), the lecture slides we used, and all other replication materials can be found at the OSF repository

[https://osf.io/x298e/?view\\_only=f9801d89a1424879b8360345b54756f7](https://osf.io/x298e/?view_only=f9801d89a1424879b8360345b54756f7).

Names were retrieved from <https://www.beliebte-vornamen.de/3774-1970er-jahre.htm>: Claudia, Katrin, Nicole, Sandra, Stefanie, Tanja, Anja; Andreas, Christian, Marcus, Matthias, Michael, Sven, Jan.

#### **1.2 Study 2**

The study was preregistered on aspredicted.org as #24898:

<http://aspredicted.org/blind.php?x=ie3bk5>. All replication materials can be found at the OSF repository [https://osf.io/x298e/?view\\_only=f9801d89a1424879b8360345b54756f7](https://osf.io/x298e/?view_only=f9801d89a1424879b8360345b54756f7).

Names were retrieved from <https://www.ssa.gov/oact/babynames/decades/names1970s.html>: Christina, Jennifer, Jessica, Julie, Lisa, Michelle, Nicole, Sarah, Stephanie, Susan; Brian, Christopher, David, John, Mark, Matthew, Michael, Richard, Robert, Thomas.

We provide the following supporting information: Participants on average took 3:50 minutes to complete the experiment and received \$0.75. The corresponding average hourly pay would be \$7.71. We restricted participation to US Citizens only, but did not require any other qualifications. 1222 Participants accepted the assignment, 804 (65.8%) completed it. Of the 418 participants who did not complete the experiment, 141 (33.7%) dropped out on the instructions page, 258 (61.7%) on the main task, and the remaining 19 (4.5%) on a later page. Of the 277 who dropped out on the main task page or later 142 (51.3%) saw a female instructor name and 135 (48.7%) a male instructor name, indicating that attrition is not treatment specific.

### **2 Part B**

In Study 2, the two sets of slides were shown side by side on participants' screens. They could navigate the sets independently using the buttons below. Questions regarding the slides were shown on the same screen (it was required to scroll down the page to reveal all questions). Figure B1 provides a screenshot.

## Slides

These are the two sets of slides (*they might take a moment to load*). Use the buttons below each set to navigate between pages. Then, give the ratings below.

Page: 1 / 11

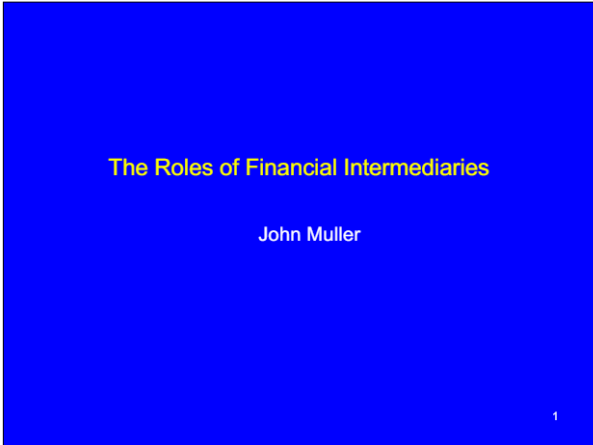

previous next

Page: 1 / 11



previous next

Please first indicate the name of the instructor on the slides to identify the slide set you have to evaluate (as there exist different sets of slides).

**Name of instructor:**

**General aspects:**

- |                                                       |              |                       |                       |                       |                       |                       |                       |                       |       |
|-------------------------------------------------------|--------------|-----------------------|-----------------------|-----------------------|-----------------------|-----------------------|-----------------------|-----------------------|-------|
| The structure of the presentation is good.            | Do not agree | <input type="radio"/> | <input type="radio"/> | <input type="radio"/> | <input type="radio"/> | <input type="radio"/> | <input type="radio"/> | <input type="radio"/> | Agree |
| The content of the presentation is clear.             | Do not agree | <input type="radio"/> | <input type="radio"/> | <input type="radio"/> | <input type="radio"/> | <input type="radio"/> | <input type="radio"/> | <input type="radio"/> | Agree |
| The topic of the presentation is interesting.         | Do not agree | <input type="radio"/> | <input type="radio"/> | <input type="radio"/> | <input type="radio"/> | <input type="radio"/> | <input type="radio"/> | <input type="radio"/> | Agree |
| The content was mathematically very sophisticated.    | Do not agree | <input type="radio"/> | <input type="radio"/> | <input type="radio"/> | <input type="radio"/> | <input type="radio"/> | <input type="radio"/> | <input type="radio"/> | Agree |
| The quality/understandability of the English is high. | Do not agree | <input type="radio"/> | <input type="radio"/> | <input type="radio"/> | <input type="radio"/> | <input type="radio"/> | <input type="radio"/> | <input type="radio"/> | Agree |
| The slides are appropriate for independent working.   | Do not agree | <input type="radio"/> | <input type="radio"/> | <input type="radio"/> | <input type="radio"/> | <input type="radio"/> | <input type="radio"/> | <input type="radio"/> | Agree |

**Layout aspects:**

- |                                                              |              |                       |                       |                       |                       |                       |                       |                       |       |
|--------------------------------------------------------------|--------------|-----------------------|-----------------------|-----------------------|-----------------------|-----------------------|-----------------------|-----------------------|-------|
| I prefer slides with a bright background.                    | Do not agree | <input type="radio"/> | <input type="radio"/> | <input type="radio"/> | <input type="radio"/> | <input type="radio"/> | <input type="radio"/> | <input type="radio"/> | Agree |
| I prefer slides with a corporate design.                     | Do not agree | <input type="radio"/> | <input type="radio"/> | <input type="radio"/> | <input type="radio"/> | <input type="radio"/> | <input type="radio"/> | <input type="radio"/> | Agree |
| A bright background increases the readability of the slides. | Do not agree | <input type="radio"/> | <input type="radio"/> | <input type="radio"/> | <input type="radio"/> | <input type="radio"/> | <input type="radio"/> | <input type="radio"/> | Agree |

[Next](#)

**Supplementary Figure 1. Study 2 screenshot**

### 3 Part C

**Table C1.** Multivariate Analysis – Study 2  
(Full Sample with Interaction Terms for Bachelor Degree)

| <i>Dependent variable:</i>          | <i>(1) Overall<br/>Quality Index</i> | <i>(2) Overall<br/>Quality Index</i> | <i>(3) Individual<br/>item responses</i> | <i>(4) Individual<br/>item responses</i> |
|-------------------------------------|--------------------------------------|--------------------------------------|------------------------------------------|------------------------------------------|
| Female rater                        | 0.84 (0.85)                          | 0.73 (0.93)                          | 0.14 (0.14)                              | 0.12 (0.16)                              |
| Female instructor                   | 0.39 (0.89)                          | 0.69 (0.97)                          | 0.07 (0.15)                              | 0.11 (0.16)                              |
| Female rater × female instructor    | 0.22 (1.18)                          | -0.09 (1.29)                         | 0.04 (0.20)                              | -0.02 (0.21)                             |
| Bachelor                            | 1.15 (0.87)                          | 1.36 (0.91)                          | 0.19 (0.14)                              | 0.23 (0.15)                              |
| Bachelor x fem. rater               | -1.81 (1.26)                         | -1.74 (1.31)                         | -0.30 (0.21)                             | -0.29 (0.22)                             |
| Bachelor x fem. instr.              | -2.18 (1.22)*                        | -2.48 (1.28)*                        | -0.36 (0.20)*                            | -0.41 (0.21)*                            |
| Bachelor. x fem. rater x fem instr. | 4.51 (1.73)***                       | 4.83 (1.80)***                       | 0.75 (0.29)***                           | 0.81 (0.30)***                           |
| Controls                            | No                                   | Yes                                  | No                                       | Yes                                      |
| N raters / items (raters)           | 800                                  | 737                                  | 4800 (800)                               | 4422 (7437)                              |

*Notes:* Columns (1) and (2) report OLS regression results, robust standard errors in parentheses. Columns (3) and (4) report panel regression results using 6 observations per rater. We include “Bachelor”, a dummy variable, which is positive for bachelor students. Moreover, we interact our independent variables with “Bachelor.” Controls are age and indicator if respondent has some background / experience in economics. \*, \*\*\* indicates significance at the 10%, 1% level, respectively.

**Table C2.** Multivariate Analysis – Study 2 – Robustness Check

| <i>Dependent variable:</i>               | (1) <i>Overall Quality Index</i> | (2) <i>Overall Quality Index</i> | (3) <i>Individual item responses</i> | (4) <i>Individual item responses</i> |
|------------------------------------------|----------------------------------|----------------------------------|--------------------------------------|--------------------------------------|
| <i>Bachelor degree: yes</i>              |                                  |                                  |                                      |                                      |
| Female rater                             | -0.83 (0.95)                     | -0.73 (0.95)                     | -0.14 (0.15)                         | -0.12 (0.15)                         |
| Female instructor                        | -1.76 (0.85)**                   | -1.77 (0.85) **                  | -0.29 (0.14)**                       | -0.30 (0.14)**                       |
| Female rater × female instructor         | 4.67 (1.26)***                   | 4.64 (1.26)***                   | 0.78 (0.22)***                       | 0.77 (0.22)***                       |
| Controls for both sets of slides browsed | Yes                              | Yes                              | Yes                                  | Yes                                  |
| Controls                                 | No                               | Yes                              | No                                   | Yes                                  |
| N                                        | 343                              | 343                              | 2058 (343)                           | 2058 (343)                           |
| <i>Bachelor degree: no</i>               |                                  |                                  |                                      |                                      |
| Female rater                             | 0.83 (0.85)                      | 0.66 (0.93)                      | 0.14 (0.14)                          | 0.11 (0.15)                          |
| Female instructor                        | 0.36 (0.88)                      | 0.63 (0.97)                      | 0.06 (0.14)                          | 0.10 (0.16)                          |
| Female rater × female instructor         | 0.20 (1.18)                      | -0.04 (1.29)                     | 0.03 (0.20)                          | -0.01 (0.21)                         |
| Controls for both sets of slides browsed | Yes                              | Yes                              | Yes                                  | Yes                                  |
| Controls                                 | No                               | Yes                              | No                                   | Yes                                  |
| N                                        | 457                              | 394                              | 2742 (457)                           | 2364 (394)                           |

*Notes:* Columns (1) and (2) report OLS regression results, robust standard errors in parentheses. Columns (3) and (4) report panel regression results using 6 observations per rater. Controls are age and indicator if respondent has some background / experience in economics. \*\*, \*\*\* indicates significance at the 5%, 1% level, respectively. Sample sizes vary across columns due to some missing values.

**Table C3.** Overall Quality Index – Study 2 (Current Students)

|                         | All raters              | Male raters<br>(N=72)  | Female raters<br>(N=52) |
|-------------------------|-------------------------|------------------------|-------------------------|
| Male instructor, N=64   | 27.53 (6.60)            | 28.26 (6.04)           | 26.40 (7.38)            |
| Female instructor, N=61 | 26.28 (5.90)            | 25.21 (6.72)           | 27.30 (4.47)            |
|                         | t(123)=1.12,<br>p=0.266 | t(70)=2.02,<br>p=0.047 | t(50)=-0.53,<br>p=0.596 |

*Notes:* Entries are values of the perceived quality index. Standard deviations in parentheses.

**Table C4.** Multivariate Analysis – Study 2 (Current Students)

| <i>Dependent variable:</i>          | (1) <i>Overall<br/>Quality Index</i> | (2) <i>Overall<br/>Quality Index</i> | (3) <i>Individual<br/>item responses</i> | (4) <i>Individual<br/>item responses</i> |
|-------------------------------------|--------------------------------------|--------------------------------------|------------------------------------------|------------------------------------------|
| Female rater                        | -1.86 (1.76)                         | -1.98 (1.78)                         | -0.31 (0.27)                             | -0.33 (0.27)                             |
| Female instructor                   | -3.04 (1.52)**                       | -3.25 (1.56)**                       | -0.51 (0.25)**                           | -0.54 (0.25)**                           |
| Female rater × female<br>instructor | 3.94 (2.28)*                         | 4.26 (2.32)*                         | 0.66 (0.38)*                             | 0.71 (0.38)*                             |
| Controls                            | No                                   | Yes                                  | No                                       | Yes                                      |
| N                                   | 124                                  | 124                                  | 744 (124)                                | 744 (124)                                |

*Notes:* Columns (1) and (2) report OLS regression results, robust standard errors in parentheses. Columns (3) and (4) report panel regression results using 6 observations per rater. Controls are age and indicator if respondent has some background / experience in economics. \*, \*\* indicates significance at the 10%, 5% level, respectively.
